# Supplementary material
Source: Springer Nature journal article supplement (https://www.springerprofessional.de/resource/supplementary/13638_2013_1067_MOESM3_ESM.pdf/11898976)

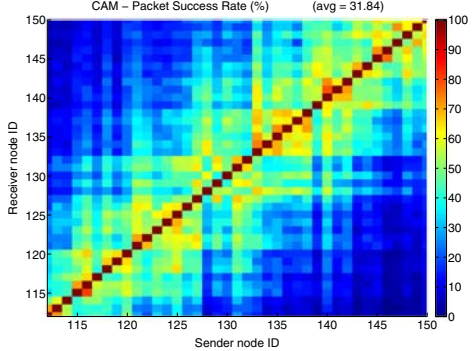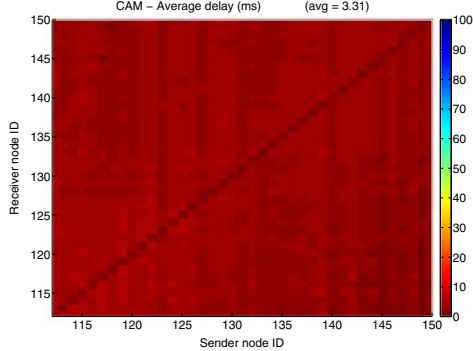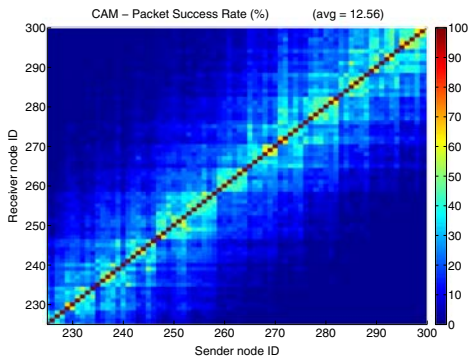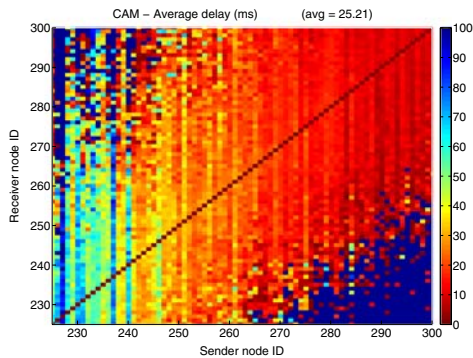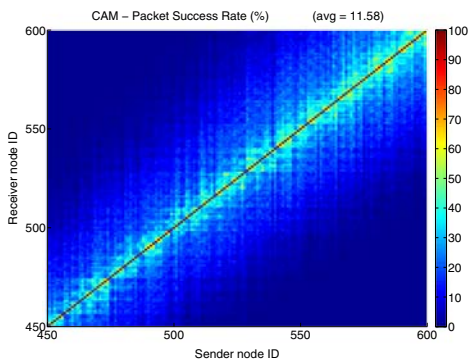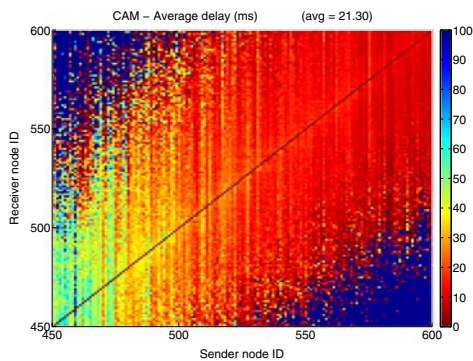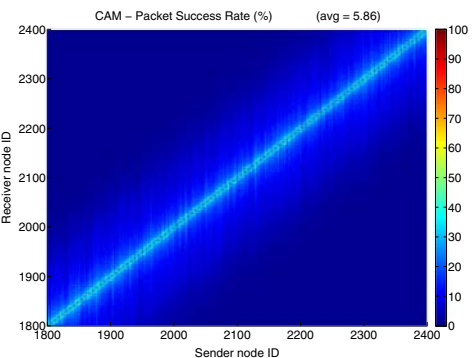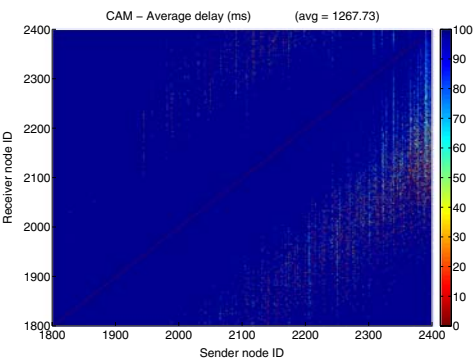

(a) CAM PSR characteristics

(b) CAM delay characteristics

Supplement: MOESM3 [file 11898976]
